# Supplementary material
Source: publisher figshare collection journal article supplement (https://gsapubs.figshare.com/articles/dataset/_/21091264)
Supplement: Supplementary file 1 [file 1]

Sherpa, T.Z.L., DeCelles, P.G., Carrapa, B., Schoenbohm, L.M., and Wolpert, J., 2022, Bhumichula plateau: A remnant high-elevation low-relief surface in the Himalayan thrust belt of western Nepal: GSA Bulletin, <https://doi.org/10.1130/B36481.1>.

## Supplemental Material

**Figure S1.** Inverse thermal models generated for samples upstream on the Bhumichula plateau at elevations >4000 m.

**Figure S2.** Inverse thermal models generated for samples downstream of Bhumichula plateau and its flanks at elevations <4000 m.

**Figure S3.** Zircon Date-eU plots.

**Figure S4.** Apatite Date-eU plots.

**Figure S5.** Radial plots for AFT samples generated using Radial Plotter (Vermeesch, 2009).

**Table S1.** Repository data of raw apatite fission track data.

**Table S2.** Zircon (U-Th)/He.

**Table S3.** Apatite (U-Th)/He.

**Table S4.** Summary of inverse thermal modeling strategy and results.

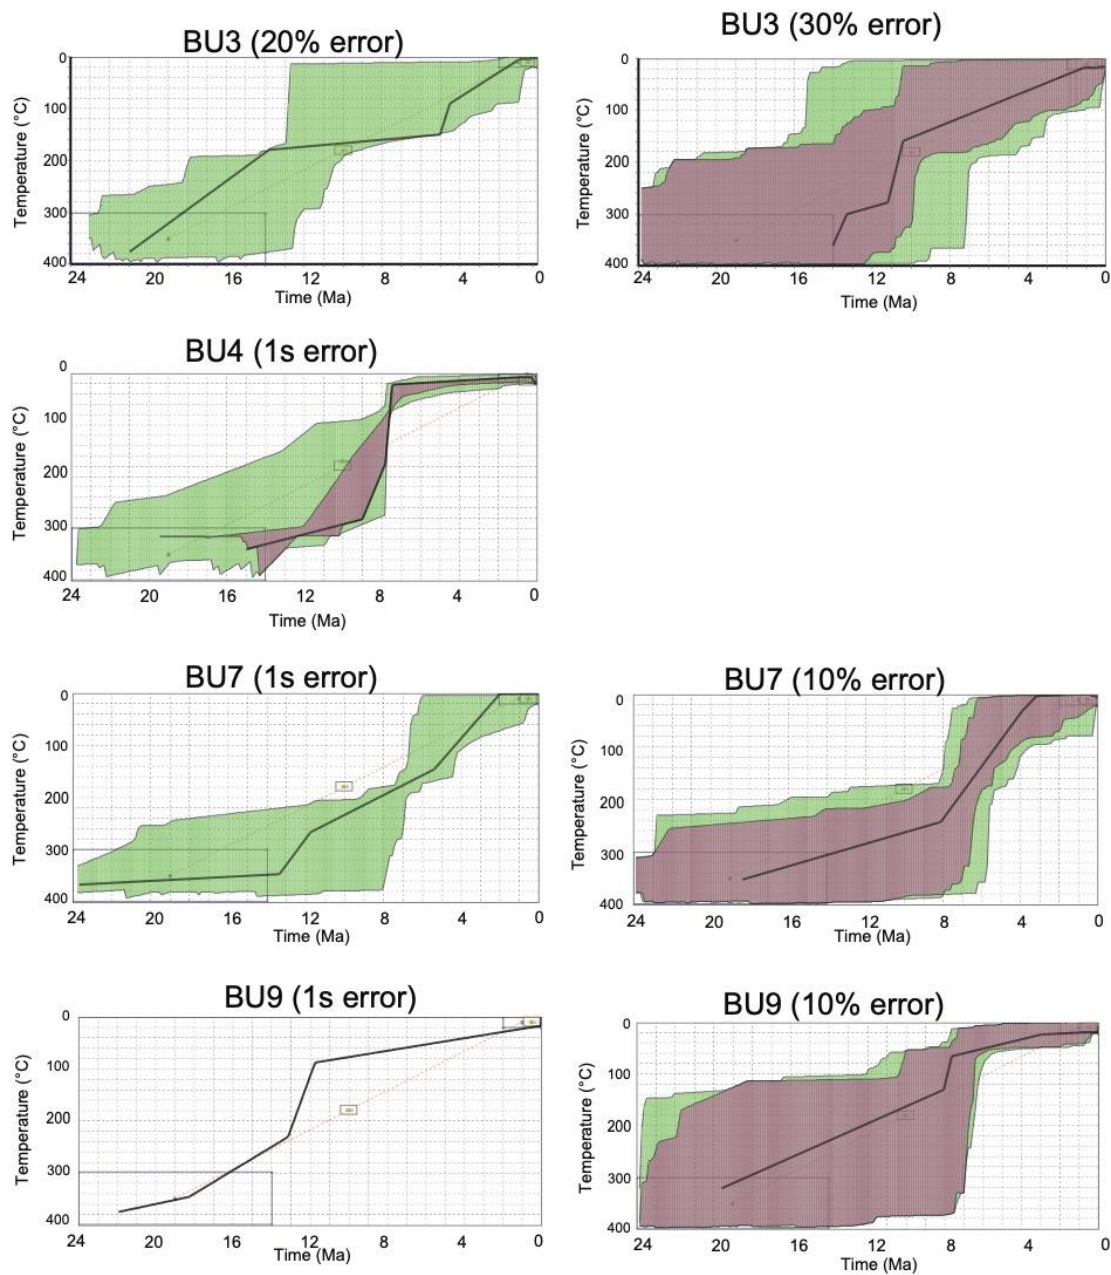

Figure S1. Inverse thermal models generated for samples upstream on the Bhumichula plateau at elevations >4000 m. All thermal models started with an uncertainty of 1 $\sigma$  for each single grain He age and were allowed to run 10,000 paths. If acceptable paths were found with no good paths or if there were no acceptable paths, we increased the error incrementally by 10% until acceptable and good paths were found. More details in supplementary table S4.

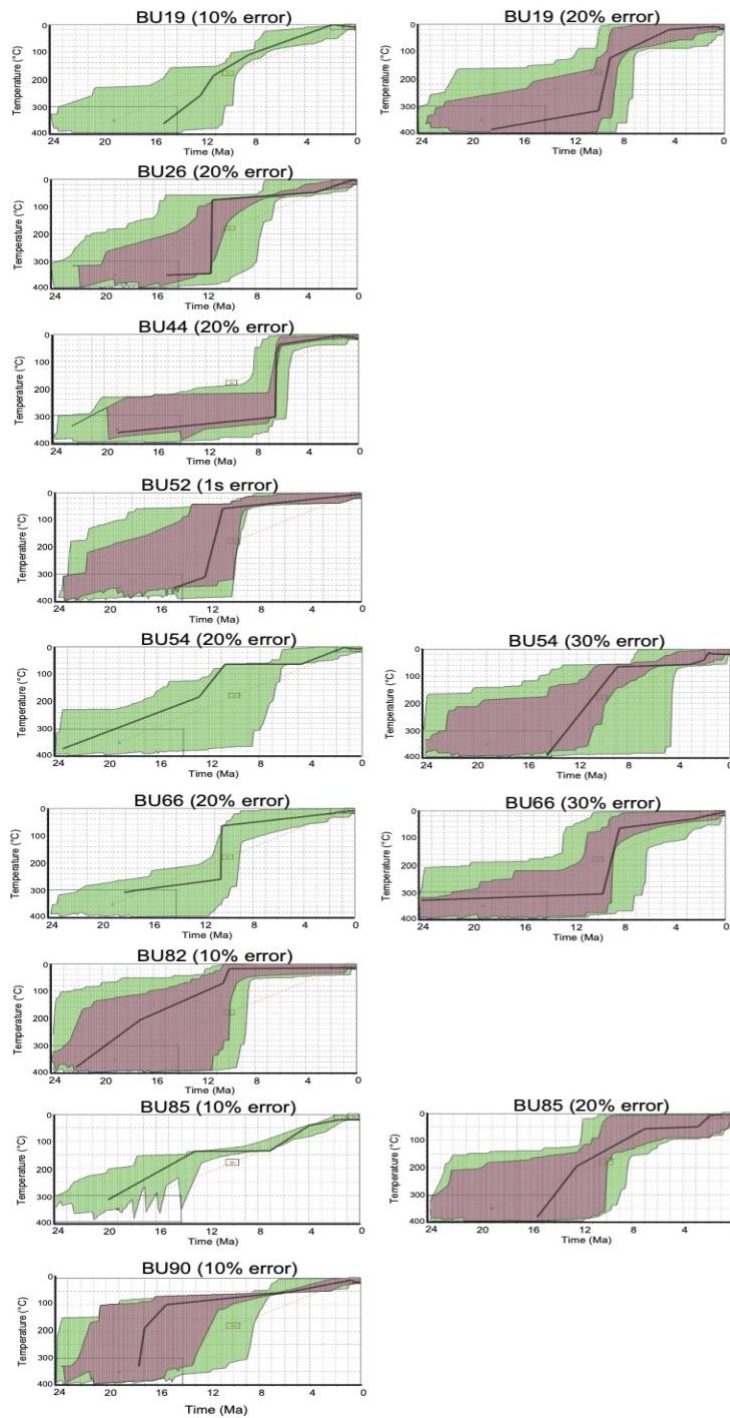

Figure S2. Inverse thermal models generated for samples downstream of Bhumichula plateau and its flanks at elevations <4000 m. All thermal models started with an uncertainty of  $1\sigma$  for each single grain He age and were allowed to run 10,000 paths. If acceptable paths were found with no good paths or if there were no acceptable paths, we increased the error incrementally by 10% until acceptable and good paths were found. More details in supplementary table S4.

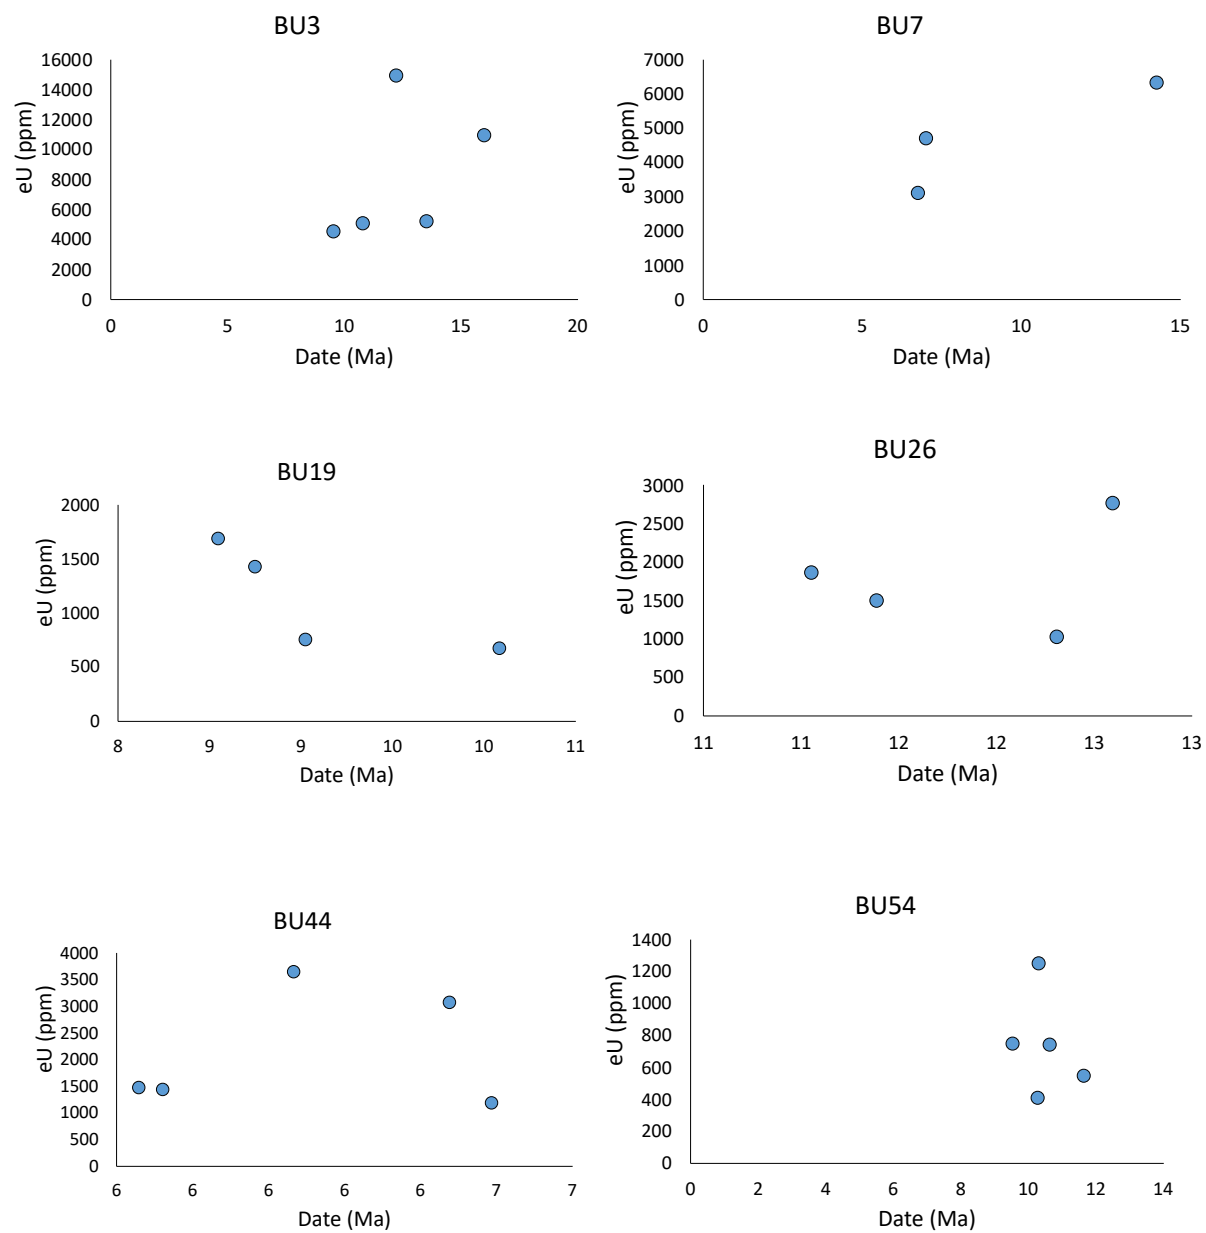

Figure S3. Zircon Date-eU plots

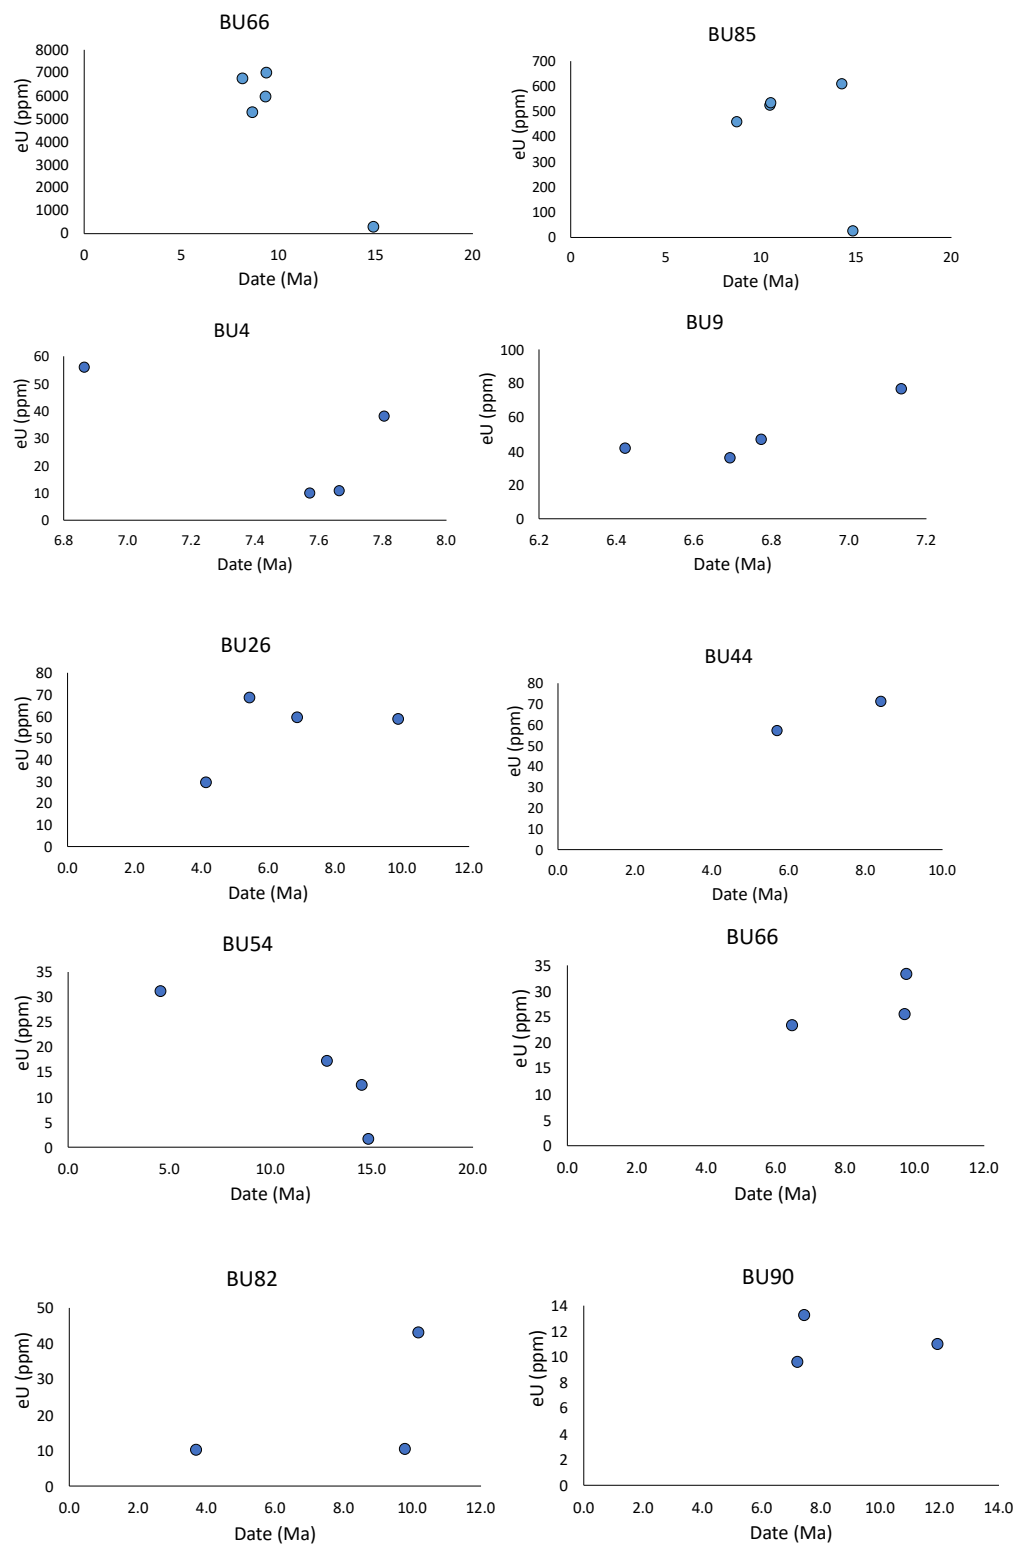

Figure S4. Apatite Date-eU plots

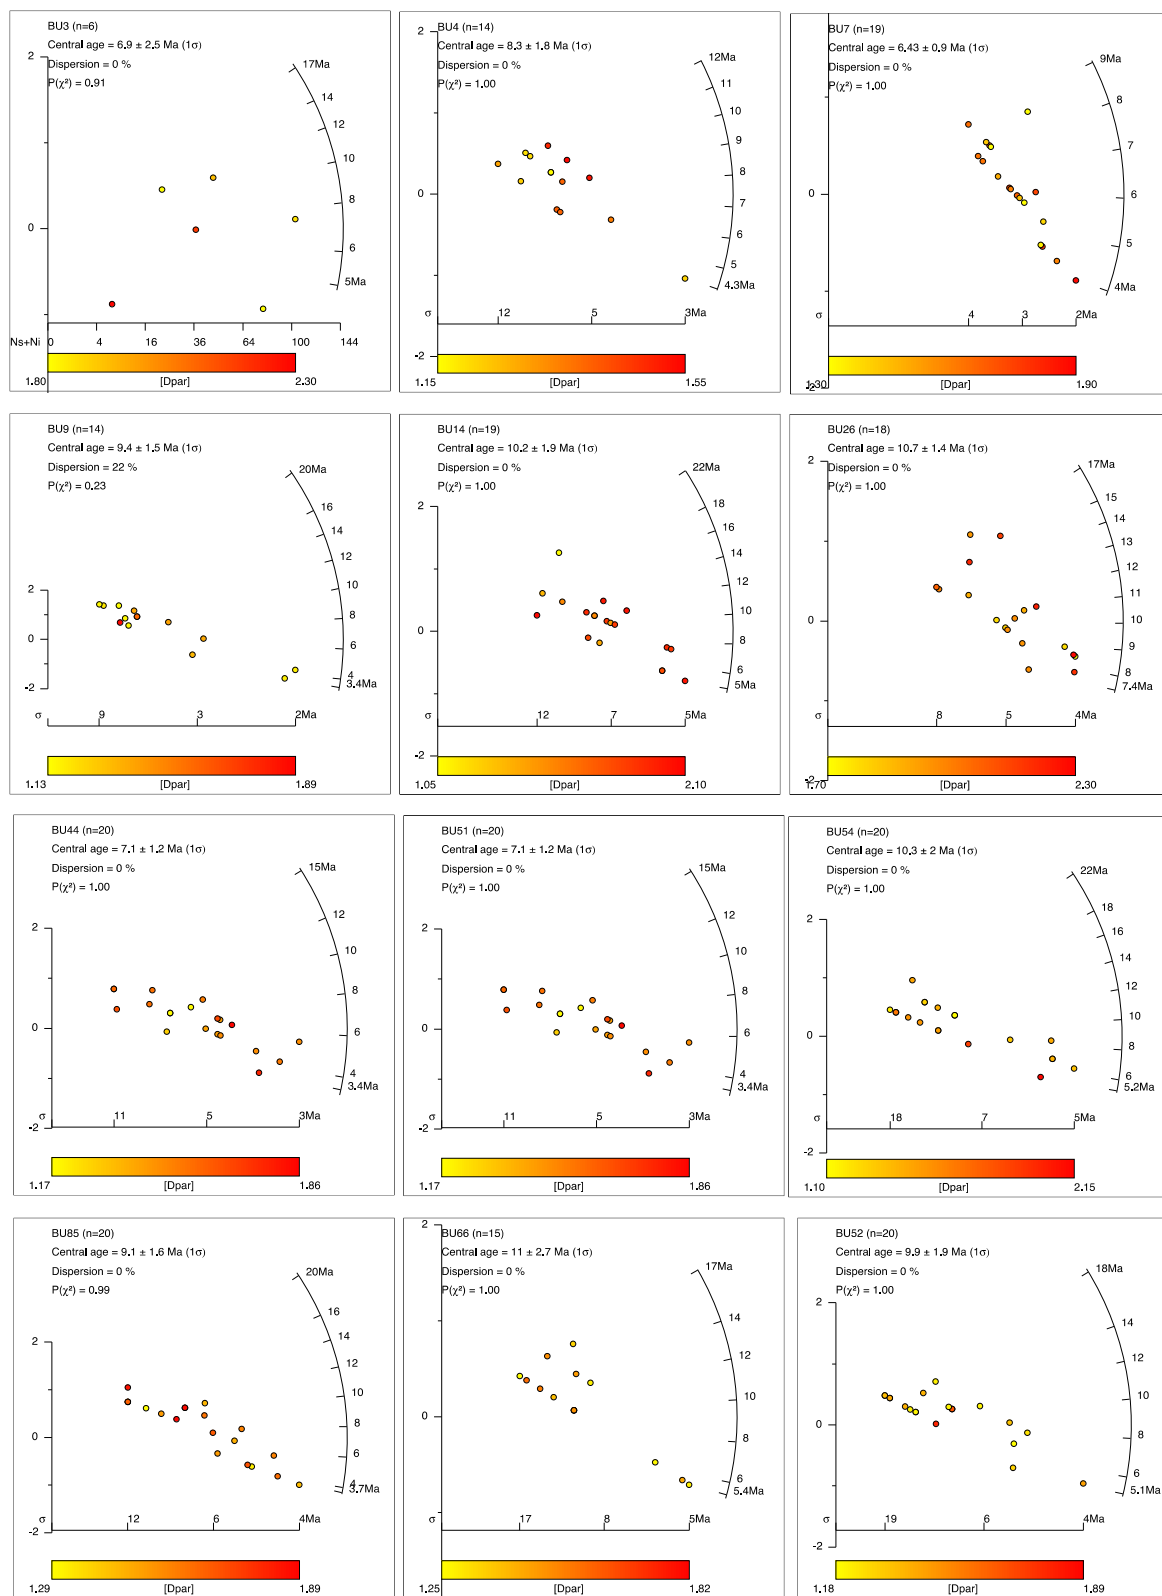

Figure S5. Radial plots for AFT samples generated using Radial Plotter (Vermeesch.,2009)
