# Supplementary material
Source: publisher figshare collection journal article supplement (https://gsapubs.figshare.com/articles/dataset/_/21091264)
Supplement: Supplementary file 1 [file 1]

## Sheet: Raw AFT
	TABLE S1. REPOSITORY DATA OF RAW APATITE FISSION TRACK DATA
BU3
N s	N i	N g	ρ s	ρ i	ρ s / ρ i	Age (Ma)	Age error	50% Age	"+95%"	"-95%"	Dpar
3	100	100	75995.3	2.53318e+06	0.03	7.37895	4.36984	9.06121	13.1075	7.56406	1.86
2	44	100	50663.6	1.1146e+06	0.0454545	11.1769	8.13769	15.0544	27.6855	13.7409	1.93
1	21	25	101327	2.12787e+06	0.047619	11.7087	12.0263	19.9593	52.4997	19.6759	1.8
1	77	100	25331.8	1.95055e+06	0.012987	3.19539	3.22775	5.38574	12.9339	5.30585	1.8
0	7	35	0	506636	0	0	N/A	25.5663	104.563	25.5663	2.3
1	36	100	25331.8	911944	0.0277778	6.83265	6.95169	11.572	28.8988	11.4036	2.2
**********	**********	**********	**********	**********	**********	**********	**********	**********	**********	**********
10	307	560	45235.3	1.38872e+06	0.0325733	8.01149	2.66471	8.55603	6.37105	4.75124
Pooled Ratio		0.0325733	±	0.0103472
Mean Ratio		0.0273064	±	0.00696957
Pooled Age		6.90453	±	2.54515	1 S.E.
Mean Crystal Age		6.71676	±	1.71502	1 S.E.
Binomial Age		7.49033	+	6.29279	"+95%"
			-	4.53717	"-95%"
Central Age		6.90453	±	2.54515
Age Dispersion		3.24844e-08	%
Chi-squared		1.35509	with	5	degrees of freedom
P (Chi-Sq)		92.9163	%
MSWD		0.271017
BU4
N s	N i	N g	ρ s	ρ i	ρ s / ρ i	Age (Ma)	Age error	50% Age	"+95%"	"-95%"	Dpar
3	70	50	151991	3.54645e+06	0.0428571	10.4249	6.21129	12.8194	18.8723	10.7187	1.55
1	26	30	84439.3	2.19542e+06	0.0384615	9.35648	9.5685	15.902	40.8427	15.6736	1.23
2	39	28	180941	3.52836e+06	0.0512821	12.4723	9.10574	16.8151	31.2278	15.3549	1.2
2	50	50	101327	2.53318e+06	0.04	9.73045	7.06629	13.0946	23.8624	11.947	1.32
2	41	25	202654	4.15441e+06	0.0487805	11.8644	8.65179	15.9891	29.5699	14.5978	1.21
1	37	50	50663.6	1.87455e+06	0.027027	6.57624	6.68839	11.1351	27.7536	10.9728	1.41
2	108	50	101327	5.47167e+06	0.0185185	4.50667	3.23926	6.04367	10.6188	5.5046	1.22
2	50	50	101327	2.53318e+06	0.04	9.73045	7.06629	13.0946	23.8624	11.947	1.15
3	60	50	151991	3.03981e+06	0.05	12.1608	7.26979	14.9654	22.2456	12.5243	1.5
2	55	50	101327	2.7865e+06	0.0363636	8.84647	6.41326	11.898	21.5492	10.8521	1.4
1	38	50	50663.6	1.92522e+06	0.0263158	6.40327	6.51023	10.8397	26.9668	10.6816	1.4
3	82	50	151991	4.15441e+06	0.0365854	8.90038	5.28731	10.9373	15.9647	9.1378	1.53
1	19	50	50663.6	962608	0.0526316	12.8002	13.1786	21.8559	58.2452	21.5475	1.3
2	76	50	101327	3.85043e+06	0.0263158	6.40327	4.61981	8.59797	15.3092	7.83598	1.36
**********	**********	**********	**********	**********	**********	**********	**********	**********	**********	**********
27	751	633	108050	3.0054e+06	0.0359521	8.74641	1.87061	8.96644	3.85884	3.23983
Pooled Ratio		0.0359521	±	0.00768911
Mean Ratio		0.0382242	±	0.0028318
Pooled Age		8.74641	±	1.87061	1 S.E.
Mean Crystal Age		9.29878	±	0.68935	1 S.E.
Binomial Age		8.96644	+	3.85884	"+95%"
			-	3.23983	"-95%"
Central Age		8.74641	±	1.87061
Age Dispersion		1.68348e-09	%
Chi-squared		2.09731	with	13	degrees of freedom
P (Chi-Sq)		99.9704	%
MSWD		0.161332
BU7
N s	N i	N g	ρ s	ρ i	ρ s / ρ i	Age (Ma)	Age error	50% Age	"+95%"	"-95%"	Dpar
4	146	100	101327	3.69844e+06	0.0273973	6.37439	3.27663	7.46005	9.19936	5.74552	1.75
4	158	100	101327	4.00242e+06	0.0253165	5.89048	3.0249	6.89257	8.47826	5.30666	1.3
5	187	100	126659	4.73704e+06	0.026738	6.22107	2.86929	7.06709	7.70141	5.06978	1.75
5	146	100	126659	3.69844e+06	0.0342466	7.96701	3.6875	9.05485	9.94903	6.50499	1.77
4	152	100	101327	3.85043e+06	0.0263158	6.12289	3.14574	7.16509	8.82411	5.51738	1.68
3	159	100	75995.4	4.02775e+06	0.0188679	4.39059	2.58635	5.38513	7.67182	4.48895	1.6
4	147	100	101327	3.72377e+06	0.0272109	6.33105	3.25406	7.40922	9.13462	5.7062	1.61
3	172	100	75995.4	4.35707e+06	0.0174419	4.05885	2.38929	4.97747	7.07705	4.14837	1.9
4	137	100	101327	3.47046e+06	0.0291971	6.79293	3.49474	7.95103	9.82607	6.12546	1.5
4	173	100	101327	4.3824e+06	0.0231214	5.37996	2.75986	6.29408	7.72157	4.84413	1.4
5	147	100	126659	3.72377e+06	0.0340136	7.91284	3.66203	8.99315	9.87873	6.46038	1.3
9	242	100	227986	6.13029e+06	0.0371901	8.65132	3.02945	9.3065	7.38105	5.39644	1.3
3	149	100	75995.4	3.77444e+06	0.0201342	4.68515	2.76154	5.7472	8.20201	4.79156	1.79
3	148	100	75995.4	3.7491e+06	0.0202703	4.7168	2.78038	5.7861	8.25909	4.82408	1.34
5	127	100	126659	3.21714e+06	0.0393701	9.15808	4.2489	10.412	11.5042	7.48716	1.65
4	121	100	101327	3.06515e+06	0.0330579	7.69063	3.96378	9.00459	11.1798	6.94148	1.64
4	125	100	101327	3.16647e+06	0.032	7.44467	3.8351	8.71586	10.8076	6.71775	1.64
5	143	100	126659	3.62245e+06	0.034965	8.13404	3.76607	9.24512	10.1661	6.64258	1.44
4	154	100	101327	3.9011e+06	0.025974	6.04341	3.1044	7.07189	8.70574	5.4453	1.45
**********	**********	**********	**********	**********	**********	**********	**********	**********	**********	**********
82	2933	1900	109327	3.91043e+06	0.0279577	6.50473	0.917902	6.55835	1.54184	1.39996
Pooled Ratio		0.0279577	±	0.0039452
Mean Ratio		0.0280436	±	0.0014684
Pooled Age		6.50473	±	0.917902	1 S.E.
Mean Crystal Age		6.5247	±	0.341806	1 S.E.
Binomial Age		6.55835	+	1.54184	"+95%"
			-	1.39996	"-95%"
Central Age		6.50473	±	0.917902
Age Dispersion		4.10454e-09	%
Chi-squared		4.08221	with	18	degrees of freedom
P (Chi-Sq)		99.9725	%
MSWD		0.22679
BU9
N s	N i	N g	ρ s	ρ i	ρ s / ρ i	Age (Ma)	Age error	50% Age	"+95%"	"-95%"	Dpar
3	62	50	151991	3.14114e+06	0.0483871	11.1223	6.64399	13.6853	20.3015	11.4507	1.89
5	63	50	253318	3.1918e+06	0.0793651	18.2329	8.61483	20.7829	23.9665	15.0545	1.2
6	105	50	303981	5.31967e+06	0.0571429	13.1329	5.62668	14.6435	14.8739	9.92795	1.4
5	99	50	253318	5.01569e+06	0.0505051	11.6087	5.41361	13.2077	14.7703	9.51723	1.2
5	99	50	253318	5.01569e+06	0.0505051	11.6087	5.41361	13.2077	14.7703	9.51723	1.6
5	171	50	253318	8.66347e+06	0.0292398	6.72338	3.10457	7.63895	8.3476	5.48263	1.4
6	146	50	303981	7.39688e+06	0.0410959	9.44758	4.01815	10.5252	10.5198	7.11235	1.41
5	270	50	253318	1.36792e+07	0.0185185	4.25896	1.95669	4.83558	5.22212	3.4635	1.18
3	200	50	151991	1.01327e+07	0.015	3.44997	2.02847	4.22968	5.99351	3.52402	1.18
2	100	50	101327	5.06636e+06	0.02	4.59955	3.30839	6.16976	10.8687	5.62013	1.35
6	87	50	303981	4.40773e+06	0.0689655	15.8467	6.82573	17.6807	18.1709	12.0158	1.13
5	58	50	253318	2.93849e+06	0.0862069	19.8023	9.38498	22.5818	26.2283	16.3775	1.15
4	77	50	202654	3.90109e+06	0.0519481	11.9401	6.20838	14.0014	17.7794	10.8262	1.15
3	69	50	151991	3.49579e+06	0.0434783	9.99484	5.95678	12.2915	18.1128	10.2782	1.15
**********	**********	**********	**********	**********	**********	**********	**********	**********	**********	**********
63	1606	700	227986	5.81183e+06	0.0392279	9.01844	1.39328	9.11574	2.48332	2.21781
Pooled Ratio		0.0392279	±	0.00606042
Mean Ratio		0.0471684	±	0.00581184
Pooled Age		9.01844	±	1.39328	1 S.E.
Mean Crystal Age		10.8424	±	1.33693	1 S.E.
Binomial Age		9.11574	+	2.48332	"+95%"
			-	2.21781	"-95%"
Central Age		9.38663	±	1.55492
Age Dispersion		22.2247	%
Chi-squared		14.9777	with	13	degrees of freedom
P (Chi-Sq)		30.8749	%
MSWD		1.15213
BU14
N s	N i	N g	ρ s	ρ i	ρ s / ρ i	Age (Ma)	Age error	50% Age	"+95%"	"-95%"	Dpar
4	67	80	126659	2.12154e+06	0.0597015	12.9298	6.74707	15.1717	19.4454	11.7457	1.07
2	30	50	101327	1.51991e+06	0.0666667	14.4366	10.6157	0	0	0	1.4
4	138	70	144753	4.99398e+06	0.0289855	6.28077	3.2309	7.35148	9.08367	5.66342	1.35
4	120	50	202654	6.07963e+06	0.0333333	7.22236	3.72289	8.45656	10.504	6.51938	1.32
2	83	50	101327	4.20508e+06	0.0240964	5.2218	3.76339	7.00915	12.4354	6.38687	1.09
4	79	50	202654	4.00242e+06	0.0506329	10.9675	5.6992	12.8597	16.3065	9.94146	1.14
3	76	50	151991	3.85043e+06	0.0394737	8.55192	5.08723	10.5125	15.409	8.78629	1.4
5	83	50	253318	4.20508e+06	0.060241	13.0466	6.11132	14.853	16.7872	10.7222	1.5
2	70	50	101327	3.54645e+06	0.0285714	6.19109	4.47157	8.31629	14.8679	7.58067	1.3
2	52	50	101327	2.63451e+06	0.0384615	8.33278	6.04688	11.2112	20.3835	10.2275	1.4
3	60	50	151991	3.03981e+06	0.05	10.8305	6.47455	13.3287	19.8189	11.1547	1.5
5	113	50	253318	5.72498e+06	0.0442478	9.58545	4.4572	10.9014	12.1104	7.84636	1.4
4	64	50	202654	3.24247e+06	0.0625	13.5353	7.07208	15.8858	20.4276	12.3039	1.1
2	30	50	101327	1.51991e+06	0.0666667	14.4366	10.6157	19.513	37.1962	17.8396	1.14
2	44	50	101327	2.2292e+06	0.0454545	9.84667	7.16916	13.2631	24.4009	12.106	1.5
2	70	50	101327	3.54645e+06	0.0285714	6.19109	4.47157	8.31629	14.8679	7.58067	1.43
5	103	50	253318	5.21835e+06	0.0485437	10.5153	4.89929	11.9622	13.3509	8.6168	1.45
2	33	50	101327	1.6719e+06	0.0606061	13.1256	9.62449	17.7234	33.4458	16.196	1.45
3	60	50	151991	3.03981e+06	0.05	10.8305	6.47455	13.3287	19.8189	11.1547	1.43
**********	**********	**********	**********	**********	**********	**********	**********	**********	**********	**********
60	1375	1000	151991	3.48312e+06	0.0436364	9.45309	1.48766	9.56042	2.68072	2.38481
Pooled Ratio		0.0436364	±	0.00686719
Mean Ratio		0.0466713	±	0.00316307
Pooled Age		9.45309	±	1.48766	1 S.E.
Mean Crystal Age		10.11	±	0.685694	1 S.E.
Binomial Age		9.56042	+	2.68072	"+95%"
			-	2.38481	"-95%"
Central Age		9.34189	±	1.4876
Age Dispersion		5.10233e-08	%
Chi-squared		2.36281	with	18	degrees of freedom
P (Chi-Sq)		99.9996	%
MSWD		0.131267
BU19
N s	N i	N g	ρ s	ρ i	ρ s / ρ i	Age (Ma)	Age error	50% Age	"+95%"	"-95%"	Dpar
2	27	50	101327	1.36792e+06	0.0740741	13.8218	10.1985	18.7057	36.122	17.1114	1.37
3	52	100	75995.3	1.31725e+06	0.0576923	10.7676	6.46017	13.2628	19.9352	11.1105	2.03
2	43	60	84439.3	1.81544e+06	0.0465116	8.68229	6.32465	11.6972	21.5673	10.6777	1.9
2	44	50	101327	2.2292e+06	0.0454545	8.4851	6.17793	11.4296	21.0361	10.4326	1.45
1	29	50	50663.6	1.46924e+06	0.0344828	6.43799	6.5714	10.9287	27.8037	10.771	1.41
5	50	50	253318	2.53318e+06	0.1	18.6525	8.89451	21.2906	25.1065	15.4801	1.05
2	38	50	101327	1.92522e+06	0.0526316	9.82383	7.17681	13.2484	24.6815	12.0995	1.96
2	58	50	101327	2.93849e+06	0.0344828	6.43799	4.66313	8.65651	15.6375	7.89458	1.95
2	45	50	101327	2.27986e+06	0.0444444	8.29666	6.03785	11.1739	20.5303	10.1984	1.89
2	40	25	202654	4.05309e+06	0.05	9.333	6.80982	12.5811	23.3343	11.4877	1.83
2	32	50	101327	1.62123e+06	0.0625	11.6641	8.56055	15.7557	29.8434	14.4002	1.56
3	59	50	151991	2.98915e+06	0.0508475	9.49107	5.6762	11.6817	17.3961	9.77762	2.05
1	40	50	50663.6	2.02654e+06	0.025	4.66819	4.74318	7.89966	19.5973	7.78428	1.3
1	40	50	50663.6	2.02654e+06	0.025	4.66819	4.74318	7.89966	19.5973	7.78428	1.8
1	18	50	50663.6	911944	0.0555556	10.3692	10.6905	17.725	47.6687	17.4759	2.1
1	27	50	50663.6	1.36792e+06	0.037037	6.91463	7.06655	11.7477	30.0902	11.5788	1.83
2	40	50	101327	2.02654e+06	0.05	9.333	6.80982	12.5811	23.3343	11.4877	1.56
1	44	50	50663.6	2.2292e+06	0.0227273	4.24395	4.30738	7.17637	17.6953	7.07124	2.05
2	59	50	101327	2.98915e+06	0.0338983	6.32893	4.58286	8.50905	15.3558	7.75974	1.9
**********	**********	**********	**********	**********	**********	**********	**********	**********	**********	**********
37	785	985	95154.9	2.01883e+06	0.0471338	8.79835	1.66217	8.9607	3.27099	2.81099
Pooled Ratio		0.0471338	±	0.00890445
Mean Ratio		0.0474916	±	0.00425101
Pooled Age		8.79835	±	1.66217	1 S.E.
Mean Crystal Age		8.86509	±	0.794019	1 S.E.
Binomial Age		8.9607	+	3.27099	"+95%"
			-	2.81099	"-95%"
Central Age		8.79835	±	1.66217
Age Dispersion		4.84439e-07	%
Chi-squared		5.34642	with	18	degrees of freedom
P (Chi-Sq)		99.8209	%
MSWD		0.297023
BU26
N s	N i	N g	ρ s	ρ i	ρ s / ρ i	Age (Ma)	Age error	50% Age	"+95%"	"-95%"	Dpar
3	82	50	151991	4.15441e+06	0.0365854	7.43909	4.41923	9.14181	13.3485	7.63791	1.97
4	67	50	202654	3.39446e+06	0.0597015	12.135	6.3323	14.2392	18.2532	11.0239	1.89
4	92	50	202654	4.66105e+06	0.0434783	8.8397	4.57826	10.3589	13.0257	7.9991	1.96
7	131	50	354645	6.63693e+06	0.0534351	10.8624	4.31583	11.9303	11.067	7.64519	2.24
3	46	25	303981	4.66105e+06	0.0652174	13.255	7.97997	16.3396	24.8044	13.7004	2
6	143	50	303981	7.24489e+06	0.041958	8.53083	3.62968	9.50444	9.50967	6.42391	1.7
4	80	50	202654	4.05309e+06	0.05	10.1646	5.28044	11.9178	15.1029	9.2125	1.79
4	84	50	202654	4.25574e+06	0.047619	9.68095	5.02363	11.3485	14.3408	8.76911	1.81
6	137	50	303981	6.94091e+06	0.0437956	8.90418	3.79174	9.92139	9.94537	6.70828	1.78
5	99	50	253318	5.01569e+06	0.0505051	10.2672	4.78801	11.6816	13.0669	8.41781	1.97
10	131	50	506636	6.63693e+06	0.0763359	15.5121	5.26053	16.59	12.8228	9.31719	2.17
5	130	50	253318	6.58626e+06	0.0384615	7.82035	3.62669	8.89069	9.81567	6.3923	2.2
6	83	50	303981	4.20508e+06	0.0722892	14.6907	6.33723	16.3941	16.9097	11.1494	2.23
6	114	50	303981	5.77565e+06	0.0526316	10.6991	4.57457	11.9271	12.0631	8.07916	1.9
3	45	25	303981	4.55972e+06	0.0666667	13.5493	8.16255	16.7049	25.4084	14.0092	2.08
4	85	50	202654	4.3064e+06	0.0470588	9.56714	4.96328	11.2146	14.1621	8.66485	1.97
8	97	50	405309	4.91437e+06	0.0824742	16.7578	6.32996	18.2198	16.0852	11.1789	1.95
6	142	50	303981	7.19423e+06	0.0422535	8.59086	3.65572	9.57148	9.57962	6.46962	2.3
**********	**********	**********	**********	**********	**********	**********	**********	**********	**********	**********
94	1788	850	280140	5.32862e+06	0.0525727	10.6872	1.45636	10.765	2.38721	2.17248
Pooled Ratio		0.0525727	±	0.00716416
Mean Ratio		0.0539148	±	0.00319551
Pooled Age		10.6872	±	1.45636	1 S.E.
Mean Crystal Age		10.9598	±	0.650103	1 S.E.
Binomial Age		10.765	+	2.38721	"+95%"
			-	2.17248	"-95%"
Central Age		10.6872	±	1.45636
Age Dispersion		1.45002e-06	%
Chi-squared		5.42641	with	17	degrees of freedom
P (Chi-Sq)		99.6284	%
MSWD		0.319201
BU 44
N s	N i	N g	ρ s	ρ i	ρ s / ρ i	Age (Ma)	Age error	50% Age	"+95%"	"-95%"	Dpar
2	70	50	101327	3.54645e+06	0.0285714	4.50741	3.29254	6.05493	10.8303	5.51942	1.49
2	34	50	101327	1.72256e+06	0.0588235	9.27653	6.87162	12.5236	23.5877	11.4432	1.57
2	22	50	101327	1.1146e+06	0.0909091	14.3308	10.7697	19.4496	38.6495	17.8144	1.55
4	120	50	202654	6.07963e+06	0.0333333	5.25834	2.77068	6.15708	7.65085	4.74684	1.48
2	22	50	101327	1.1146e+06	0.0909091	14.3308	10.7697	19.4496	38.6495	17.8144	1.59
2	78	50	101327	3.95176e+06	0.025641	4.04526	2.95089	5.43149	9.66613	4.94995	1.54
1	16	50	50663.6	810617	0.0625	9.85587	10.2511	16.888	46.2913	16.6528	1.66
3	71	50	151991	3.59711e+06	0.0422535	6.66478	4.03602	8.19558	12.0657	6.85246	1.44
1	50	50	50663.6	2.53318e+06	0.02	3.15552	3.21693	5.33124	13.0537	5.25288	1.78
2	57	50	101327	2.88782e+06	0.0350877	5.53498	4.05547	7.44326	13.4637	6.78851	1.44
3	59	50	151991	2.98915e+06	0.0508475	8.01948	4.87533	9.87071	14.7044	8.26201	1.18
2	41	50	101327	2.07721e+06	0.0487805	7.69368	5.67298	10.3695	19.201	9.46758	1.61
3	76	50	151991	3.85043e+06	0.0394737	6.22652	3.76585	7.65433	11.2257	6.39766	1.86
1	28	50	50663.6	1.41858e+06	0.0357143	5.63377	5.78668	9.56796	24.4331	9.43013	1.31
2	58	50	101327	2.93849e+06	0.0344828	5.43959	3.98445	7.31425	13.2166	6.67053	1.49
2	53	50	101327	2.68517e+06	0.0377358	5.95252	4.36678	8.00824	14.5517	7.30533	1.43
3	70	50	151991	3.54645e+06	0.0428571	6.75994	4.09477	8.31314	12.2489	6.95129	1.68
2	41	50	101327	2.07721e+06	0.0487805	7.69368	5.67298	10.3695	19.201	9.46758	1.17
3	43	50	151991	2.17853e+06	0.0697674	11.0009	6.74467	13.5684	20.7396	11.3837	1.57
4	74	50	202654	3.7491e+06	0.0540541	8.52488	4.53357	9.99885	12.7387	7.73454	1.53
**********	**********	**********	**********	**********	**********	**********	**********	**********	**********	**********
46	1083	1000	116526	2.74343e+06	0.0424746	6.69963	1.37245	6.79883	2.19896	1.92292
Pooled Ratio		0.0424746	±	0.00870113
Mean Ratio		0.0475261	±	0.00433453
Pooled Age		6.69963	±	1.37245	1 S.E.
Mean Crystal Age		7.49596	±	0.684016	1 S.E.
Binomial Age		6.79883	+	2.19896	"+95%"
			-	1.92292	"-95%"
Central Age		6.69963	±	1.37245
Age Dispersion		3.05631e-09	%
Chi-squared		5.01238	with	19	degrees of freedom
P (Chi-Sq)		99.9421	%
MSWD		0.263809
BU 51
N s	N i	N g	ρ s	ρ i	ρ s / ρ i	Age (Ma)	Age error	50% Age	"+95%"	"-95%"	Dpar
1	13	50	50663.6	658626	0.0769231	12.9002	13.433	22.2097	63.1947	21.9059	1.79
2	30	50	101327	1.51991e+06	0.0666667	11.1816	8.22226	15.1148	28.8407	13.819	1.53
1	14	50	50663.6	709290	0.0714286	11.9796	12.4427	20.5872	57.7457	20.3036	1.48
1	13	50	50663.6	658626	0.0769231	12.9002	13.433	22.2097	63.1947	21.9059	1.51
1	15	25	101327	1.51991e+06	0.0666667	11.1816	11.5883	19.1856	53.1492	18.9197	1.66
1	13	25	101327	1.31725e+06	0.0769231	12.9002	13.433	22.2097	63.1947	21.9059	1.82
1	23	50	50663.6	1.16526e+06	0.0434783	7.29458	7.47779	12.4202	32.3713	12.243	1.1
1	9	16	158324	1.42491e+06	0.111111	18.6253	19.6979	32.4333	100.788	32.0078	1.23
1	17	50	50663.6	861281	0.0588235	9.86717	10.1886	16.8861	45.8278	16.6499	1.21
1	24	50	50663.6	1.21593e+06	0.0416667	6.9908	7.1602	11.8958	30.8562	11.7257	1.44
1	10	25	101327	1.01327e+06	0.1	16.7652	17.6424	29.0864	87.8491	28.6996	1.53
1	17	50	50663.6	861281	0.0588235	9.86717	10.1886	16.8861	45.8278	16.6499	1.47
1	13	25	101327	1.31725e+06	0.0769231	12.9002	13.433	22.2097	63.1947	21.9059	1.24
1	15	50	50663.6	759953	0.0666667	11.1816	11.5883	19.1856	53.1492	18.9197	1.49
1	18	50	50663.6	911944	0.0555556	9.31939	9.60819	15.9314	42.8671	15.7076	1.37
1	22	50	50663.6	1.1146e+06	0.0454545	7.62595	7.82483	12.9929	34.0415	12.808	1.55
3	55	50	151991	2.7865e+06	0.0545455	9.15006	5.48164	11.2667	16.8669	9.43479	1.46
**********	**********	**********	**********	**********	**********	**********	**********	**********	**********	**********
20	321	716	70759.2	1.13568e+06	0.0623053	10.4507	2.57054	10.8105	5.59509	4.51027
Pooled Ratio		0.0623053	±	0.0153251		1153170
Mean Ratio		0.0675635	±	0.00450582
Pooled Age		10.4507	±	2.57054	1 S.E.
Mean Crystal Age		11.3319	±	0.756349	1 S.E.
Binomial Age		10.8105	+	5.59509	"+95%"
			-	4.51027	"-95%"
Central Age		10.4507	±	2.57054
Age Dispersion		8.90177e-18	%
Chi-squared		1.12376	with	16	degrees of freedom
P (Chi-Sq)		100	%
MSWD		0.0702348
BU52
N s	N i	N g	ρ s	ρ i	ρ s / ρ i	Age (Ma)	Age error	50% Age	"+95%"	"-95%"	Dpar
1	35	50	50663.6	1.77322e+06	0.0285714	5.09117	5.1812	8.62572	21.6053	8.50031	1.31
2	25	50	101327	1.26659e+06	0.08	14.2452	10.5367	19.2977	37.6411	17.6608	1.4
1	10	50	50663.6	506636	0.1	17.8015	18.7306	30.8825	93.2221	30.4718	1.47
1	11	50	50663.6	557299	0.0909091	16.1852	16.9599	27.9939	82.5513	27.6174	1.34
2	33	50	101327	1.6719e+06	0.0606061	10.7947	7.9134	14.5769	27.5274	13.321	1.89
3	50	9	844393	1.40732e+07	0.06	10.6868	6.41602	13.1667	19.8551	11.0332	1.21
3	35	50	151991	1.77322e+06	0.0857143	15.2615	9.2708	18.8556	29.432	15.8497	1.23
1	14	50	50663.6	709290	0.0714286	12.7204	13.2105	21.8594	61.2912	21.5583	1.41
3	66	50	151991	3.3438e+06	0.0454545	8.0977	4.82879	9.96094	14.7262	8.33177	1.26
2	69	50	101327	3.49579e+06	0.0289855	5.16493	3.73021	6.93855	12.4176	6.32507	1.45
1	10	16	158324	1.58324e+06	0.1	17.8015	18.7306	30.8825	93.2221	30.4718	1.37
1	15	50	50663.6	759953	0.0666667	11.8732	12.3033	20.3713	56.4144	20.089	1.21
1	16	50	50663.6	810617	0.0625	11.1317	11.5126	19.0728	52.247	18.8071	1.45
3	60	50	151991	3.03981e+06	0.05	8.90691	5.32264	10.9618	16.3069	9.17415	1.35
2	33	25	202654	3.3438e+06	0.0606061	10.7947	7.9134	14.5769	27.5274	13.321	1.67
1	11	50	50663.6	557299	0.0909091	16.1852	16.9599	27.9939	82.5513	27.6174	1.43
1	16	50	50663.6	810617	0.0625	11.1317	11.5126	19.0728	52.247	18.8071	1.21
1	20	50	50663.6	1.01327e+06	0.05	8.90691	9.15771	15.1979	40.2892	14.9828	1.81
2	32	50	101327	1.62123e+06	0.0625	11.1317	8.16766	15.0367	28.4862	13.7432	1.21
2	50	50	101327	2.53318e+06	0.04	7.12651	5.17401	9.59104	17.4912	8.7507	1.18
**********	**********	**********	**********	**********	**********	**********	**********	**********	**********	**********
34	611	900	95697.8	1.71975e+06	0.0556465	9.91199	1.93618	10.1119	3.88699	3.30903
Pooled Ratio		0.0556465	±	0.0108698		1153170
Mean Ratio		0.0648676	±	0.00477214
Pooled Age		9.91199	±	1.93618	1 S.E.
Mean Crystal Age		11.553	±	0.850633	1 S.E.
Binomial Age		10.1119	+	3.88699	"+95%"
			-	3.30903	"-95%"
Central Age		9.91199	±	1.93618
Age Dispersion		1.97895e-09	%
Chi-squared		3.70922	with	19	degrees of freedom
P (Chi-Sq)		99.9941	%
MSWD		0.195222
BU54
N s	N i	N g	ρ s	ρ i	ρ s / ρ i	Age (Ma)	Age error	50% Age	"+95%"	"-95%"	Dpar
1	14	50	50663.6	709290	0.0714286	13.4357	13.9551	23.0877	64.7119	22.7696	1.55
1	11	50	50663.6	557299	0.0909091	17.0951	17.9156	29.5661	87.1459	29.1684	1.17
2	31	50	101327	1.57057e+06	0.0645161	12.1367	8.91567	16.3994	31.1668	14.9908	1.3
1	12	50	50663.6	607963	0.0833333	15.6723	16.3677	27.0373	78.1531	26.6703	1.19
2	24	50	101327	1.21593e+06	0.0833333	15.6723	11.6128	21.2421	41.6523	19.445	1.5
1	19	9	281464	5.34782e+06	0.0526316	9.90271	10.1955	16.9112	45.1311	16.6727	1.52
1	16	50	50663.6	810617	0.0625	11.7578	12.1617	20.1448	55.1664	19.8642	1.53
3	26	50	151991	1.31725e+06	0.115385	21.6899	13.3561	26.8842	43.6207	22.6767	1.48
1	19	50	50663.6	962608	0.0526316	9.90271	10.1955	16.9112	45.1311	16.6727	1.5
1	24	50	50663.6	1.21593e+06	0.0416667	7.8409	8.0309	13.3418	34.5929	13.151	1.91
1	12	16	158324	1.89988e+06	0.0833333	15.6723	16.3677	27.0373	78.1531	26.6703	1.68
1	36	50	50663.6	1.82389e+06	0.0277778	5.22833	5.31945	8.85564	22.1315	8.72676	2.15
2	54	50	101327	2.73583e+06	0.037037	6.97016	5.0547	9.37597	17.0109	8.55244	1.59
2	54	50	101327	2.73583e+06	0.037037	6.97016	5.0547	9.37597	17.0109	8.55244	1.43
2	31	25	202654	3.14114e+06	0.0645161	12.1367	8.91567	16.3994	31.1668	14.9908	1.1
2	59	50	101327	2.98915e+06	0.0338983	6.37976	4.61964	8.57738	15.4789	7.82205	1.36
2	44	50	101327	2.2292e+06	0.0454545	8.55324	6.22751	11.5213	21.2046	10.5163	1.33
2	27	50	101327	1.36792e+06	0.0740741	13.9328	10.2803	18.8558	36.4106	17.2487	1.44
2	24	50	101327	1.21593e+06	0.0833333	15.6723	11.6128	21.2421	41.6523	19.445	1.29
3	66	50	151991	3.3438e+06	0.0454545	8.55324	5.10242	10.5212	15.5528	8.80034	1.46
**********	**********	**********	**********	**********	**********	**********	**********	**********	**********	**********
33	603	900	92883.2	1.69723e+06	0.0547264	10.2965	2.0424	10.5104	4.10403	3.48602
Pooled Ratio		0.0547264	±	0.0108554
Mean Ratio		0.0625126	±	0.00515346
Pooled Age		10.2965	±	2.0424	1 S.E.
Mean Crystal Age		11.7601	±	0.970303	1 S.E.
Binomial Age		10.5104	+	4.10403	"+95%"
			-	3.48602	"-95%"
Central Age		10.2965	±	2.0424
Age Dispersion		3.51325e-08	%
Chi-squared		4.91062	with	19	degrees of freedom
P (Chi-Sq)		99.9501	%
MSWD		0.258454
BU62
N s	N i	N g	ρ s	ρ i	ρ s / ρ i	Age (Ma)	Age error	50% Age	"+95%"	"-95%"	Dpar
1	10	50	50663.6	506636	0.1	19.1416	20.1407	33.2048	100.16	32.7631	1.27
2	30	50	101327	1.51991e+06	0.0666667	12.7674	9.38591	17.2576	32.9135	15.7779	1.52
1	13	50	50663.6	658626	0.0769231	14.7294	15.3357	25.3564	72.0806	25.0094	1.41
1	12	25	101327	1.21593e+06	0.0833333	15.9553	16.6612	27.5251	79.5516	27.1514	1.1
1	14	25	101327	1.41858e+06	0.0714286	13.6784	14.2054	23.5044	65.8717	23.1806	1.04
2	25	50	101327	1.26659e+06	0.08	15.3178	11.3301	20.7503	40.4609	18.99	0.95
1	13	25	101327	1.31725e+06	0.0769231	14.7294	15.3357	25.3564	72.0806	25.0094	1.51
2	39	50	101327	1.97588e+06	0.0512821	9.82332	7.17	13.2447	24.6166	12.0948	1.16
1	15	25	101327	1.51991e+06	0.0666667	12.7674	13.23	21.9045	60.6333	21.6009	1.16
2	27	50	101327	1.36792e+06	0.0740741	14.1844	10.4633	19.1963	37.0651	17.5601	1.46
2	28	50	101327	1.41858e+06	0.0714286	13.6784	10.0777	18.5034	35.5706	16.9229	1.34
3	38	50	151991	1.92522e+06	0.0789474	15.1165	9.15463	18.6624	28.8615	15.6743	1.23
1	11	50	50663.6	557299	0.0909091	17.4038	18.2368	30.0995	88.7035	29.6946	1.28
2	24	50	101327	1.21593e+06	0.0833333	15.9553	11.8196	21.6256	42.4005	19.7959	1.35
1	12	50	50663.6	607963	0.0833333	15.9553	16.6612	27.5251	79.5516	27.1514	1.36
2	25	50	101327	1.26659e+06	0.08	15.3178	11.3301	20.7503	40.4609	18.99	1.03
**********	**********	**********	**********	**********	**********	**********	**********	**********	**********	**********
25	336	700	90470.7	1.21593e+06	0.0744048	14.2477	3.18853	14.6422	6.74897	5.54943
Pooled Ratio		0.0744048	±	0.0166513
Mean Ratio		0.0772031	±	0.00274587
Pooled Age		14.2477	±	3.18853	1 S.E.
Mean Crystal Age		14.7829	±	0.526364	1 S.E.
Binomial Age		14.6422	+	6.74897	"+95%"
			-	5.54943	"-95%"
Central Age		14.2477	±	3.18853
Age Dispersion		3.23089e-20	%
Chi-squared		0.500967	with	15	degrees of freedom
P (Chi-Sq)		100	%
MSWD		0.0333978
BU66
N s	N i	N g	ρ s	ρ i	ρ s / ρ i	Age (Ma)	Age error	50% Age	"+95%"	"-95%"	Dpar
1	20	50	50663.6	1.01327e+06	0.05	9.91786	10.1971	16.9219	44.8378	16.6824	1.34
1	20	50	50663.6	1.01327e+06	0.05	9.91786	10.1971	16.9219	44.8378	16.6824	1.27
1	15	50	50663.6	759953	0.0666667	13.2204	13.6994	0	0	0	1.55
1	13	25	101327	1.31725e+06	0.0769231	15.2519	15.8798	26.2552	74.6158	25.8959	1.59
1	12	25	101327	1.21593e+06	0.0833333	16.5213	17.2522	0	0	0	1.25
1	20	25	101327	2.02654e+06	0.05	9.91786	10.1971	16.9219	44.8378	16.6824	1.82
3	35	50	151991	1.77322e+06	0.0857143	16.9927	10.3225	20.9939	32.7558	17.6466	1.35
2	29	50	101327	1.46924e+06	0.0689655	13.6758	10.0644	18.4922	35.3986	16.9095	1.48
2	23	50	101327	1.16526e+06	0.0869565	17.2387	12.7913	23.3785	46.1033	21.4062	1.51
1	36	25	101327	3.64778e+06	0.0277778	5.51181	5.60712	9.33566	23.3281	9.19978	1.45
1	32	50	50663.6	1.62123e+06	0.03125	6.20045	6.31825	10.5141	26.5158	10.3617	1.27
1	17	25	101327	1.72256e+06	0.0588235	11.6665	12.0449	19.9634	54.1315	19.684	1.4
1	37	25	101327	3.7491e+06	0.027027	5.3629	5.45366	9.0812	22.6471	8.9489	1.29
2	32	50	101327	1.62123e+06	0.0625	12.3949	9.09452	16.7425	31.7056	15.3021	1.28
1	20	50	50663.6	1.01327e+06	0.05	9.91786	10.1971	16.9219	44.8378	16.6824	1.5
**********	**********	**********	**********	**********	**********	**********	**********	**********	**********	**********
20	361	600	84439.3	1.52413e+06	0.0554017	10.9884	2.68884	11.3654	5.85222	4.73114
Pooled Ratio		0.0554017	±	0.0135567
Mean Ratio		0.0583958	±	0.00519369
Pooled Age		10.9884	±	2.68884	1 S.E.
Mean Crystal Age		11.5817	±	1.03092	1 S.E.
Binomial Age		11.3654	+	5.85222	"+95%"
			-	4.73114	"-95%"
Central Age		10.6893	±	2.73897
Age Dispersion		8.71579e-09	%
Chi-squared		2.50958	with	14	degrees of freedom
P (Chi-Sq)		99.9673	%
MSWD		0.179256
BU82
N s	N i	N g	ρ s	ρ i	ρ s / ρ i	Age (Ma)	Age error	50% Age	"+95%"	"-95%"	Dpar
1	18	50	50663.6	911944	0.0555556	11.5969	11.9547	19.8224	53.2773	19.5438	1.61
2	27	25	202654	2.73583e+06	0.0740741	15.4579	11.4027	20.919	40.3756	19.1357	1.45
2	40	50	101327	2.02654e+06	0.05	10.4382	7.61419	14.0704	26.088	12.8475	1.57
1	17	50	50663.6	861281	0.0588235	12.2784	12.6767	21.0099	56.9519	20.7158	1.25
1	18	50	50663.6	911944	0.0555556	11.5969	11.9547	19.8224	53.2773	19.5438	1.72
1	12	50	50663.6	607963	0.0833333	17.3875	18.1568	29.9936	86.6214	29.5863	1.53
1	17	50	50663.6	861281	0.0588235	12.2784	12.6767	21.0099	56.9519	20.7158	1.48
1	29	50	50663.6	1.46924e+06	0.0344828	7.20054	7.34875	12.2227	31.0846	12.0463	1.55
1	12	25	101327	1.21593e+06	0.0833333	17.3875	18.1568	29.9936	86.6214	29.5863	1.13
1	16	50	50663.6	810617	0.0625	13.0451	13.4914	22.3487	61.1629	22.0373	1.15
1	12	50	50663.6	607963	0.0833333	17.3875	18.1568	29.9936	86.6214	29.5863	1.33
4	80	50	202654	4.05309e+06	0.05	10.4382	5.41989	12.2385	15.5084	9.46034	1.46
2	21	50	101327	1.06393e+06	0.0952381	19.8677	14.7974	26.9797	53.915	24.7182	1.19
1	11	50	50663.6	557299	0.0909091	18.9659	19.8737	0	0	0	1.8
1	16	50	50663.6	810617	0.0625	13.0451	13.4914	0	0	0	1.37
**********	**********	**********	**********	**********	**********	**********	**********	**********	**********	**********
20	330	650	77943.9	1.28608e+06	0.0606061	12.6501	3.10221	13.0852	6.76216	5.45576
Pooled Ratio		0.0606061	±	0.0148625
Mean Ratio		0.0665641	±	0.00451879
Pooled Age		12.6501	±	3.10221	1 S.E.
Mean Crystal Age		13.8924	±	0.944052	1 S.E.
Binomial Age		13.0852	+	6.76216	"+95%"
			-	5.45576	"-95%"
Central Age		12.4322	±	3.11736
Age Dispersion		7.43239e-14	%
Chi-squared		0.902317	with	14	degrees of freedom
P (Chi-Sq)		99.9999	%
MSWD		0.0644512
BU85
N s	N i	N g	ρ s	ρ i	ρ s / ρ i	Age (Ma)	Age error	50% Age	"+95%"	"-95%"	Dpar
1	47	50	50663.6	2.38119e+06	0.0212766	4.51179	4.57599	7.62541	18.7254	7.5135	1.33
2	26	50	101327	1.31725e+06	0.0769231	16.297	12.0404	22.0645	42.7844	20.1879	1.5
2	42	50	101327	2.12787e+06	0.047619	10.0934	7.35641	13.6004	25.1145	12.416	1.89
2	26	50	101327	1.31725e+06	0.0769231	16.297	12.0404	22.0645	42.7844	20.1879	1.58
2	32	50	101327	1.62123e+06	0.0625	13.2444	9.7203	17.8895	33.869	16.3503	1.29
3	32	50	151991	1.62123e+06	0.09375	19.8564	12.1103	24.5527	38.7048	20.6573	1.86
2	26	50	101327	1.31725e+06	0.0769231	16.297	12.0404	22.0645	42.7844	20.1879	1.67
1	39	50	50663.6	1.97588e+06	0.025641	5.4369	5.52594	9.20212	22.8606	9.06782	1.53
2	37	50	101327	1.87455e+06	0.0540541	11.4562	8.37489	15.4529	28.8456	14.1142	1.53
3	55	50	151991	2.7865e+06	0.0545455	11.5603	6.92555	14.2338	21.2967	11.919	1.58
1	53	50	50663.6	2.68517e+06	0.0188679	4.00118	4.05336	6.75708	16.487	6.6576	1.64
3	55	50	151991	2.7865e+06	0.0545455	11.5603	6.92555	14.2338	21.2967	11.919	1.88
3	78	50	151991	3.95176e+06	0.0384615	8.15363	4.84807	10.0219	14.6701	8.37514	1.59
4	73	50	202654	3.69844e+06	0.0547945	11.613	6.04639	13.6212	17.3583	10.5372	1.47
2	61	50	101327	3.09048e+06	0.0327869	6.95128	5.03082	9.34387	16.8262	8.52023	1.48
2	74	50	101327	3.7491e+06	0.027027	5.73065	4.136	7.69588	13.723	7.01429	1.59
3	63	50	151991	3.1918e+06	0.047619	10.0934	6.02732	12.4185	18.4068	10.3899	1.63
2	54	50	101327	2.73583e+06	0.037037	7.85182	5.69408	10.5617	19.1572	9.63394	1.69
1	58	50	50663.6	2.93849e+06	0.0172414	3.65635	3.7011	6.17144	14.993	6.0804	1.45
1	46	50	50663.6	2.33052e+06	0.0217391	4.60984	4.67648	7.79231	19.1587	7.67801	1.71
**********	**********	**********	**********	**********	**********	**********	**********	**********	**********	**********
42	977	1000	106393	2.47492e+06	0.0429887	9.11269	1.63566	9.26049	3.14669	2.73374
Pooled Ratio		0.0429887	±	0.00771617
Mean Ratio		0.0470138	±	0.00501136
Pooled Age		9.11269	±	1.63566	1 S.E.
Mean Crystal Age		9.96525	±	1.06296	1 S.E.
Binomial Age		9.26049	+	3.14669	"+95%"
			-	2.73374	"-95%"
Central Age		9.11269	±	1.63566
Age Dispersion		2.57181e-06	%
Chi-squared		7.1206	with	19	degrees of freedom
P (Chi-Sq)		99.3542	%
MSWD		0.374768
BU90
N s	N i	N g	ρ s	ρ i	ρ s / ρ i	Age (Ma)	Age error	50% Age	"+95%"	"-95%"	Dpar
1	11	50	50663.6	557299	0.0909091	19.8726	20.8239	34.3644	101.141	33.902	1.54
1	11	50	50663.6	557299	0.0909091	19.8726	20.8239	34.3644	101.141	33.902	1.59
1	23	30	84439.3	1.9421e+06	0.0434783	9.51195	9.74963	16.1937	42.1618	15.9626	1.15
1	14	30	84439.3	1.18215e+06	0.0714286	15.6194	16.2212	26.8368	75.1374	26.467	1.22
1	18	50	50663.6	911944	0.0555556	12.1517	12.5267	20.77	55.8092	20.478	1.23
1	16	50	50663.6	810617	0.0625	13.669	14.1368	23.4169	64.0664	23.0906	1.17
1	15	50	50663.6	759953	0.0666667	14.5793	15.1076	25.0105	69.1684	24.6638	1.49
1	24	50	50663.6	1.21593e+06	0.0416667	9.1159	9.33563	15.5102	40.191	15.2884	1.6
1	15	50	50663.6	759953	0.0666667	14.5793	15.1076	25.0105	69.1684	24.6638	1.67
1	18	50	50663.6	911944	0.0555556	12.1517	12.5267	20.77	55.8092	20.478	1.51
1	12	50	50663.6	607963	0.0833333	18.2189	19.0251	31.4262	90.72	30.9994	1.84
1	14	50	50663.6	709290	0.0714286	15.6194	16.2212	26.8368	75.1374	26.467	1.54
2	25	50	101327	1.26659e+06	0.08	17.4912	12.9378	23.6929	46.1678	21.6826	1.12
2	22	50	101327	1.1146e+06	0.0909091	19.8726	14.7724	26.9667	53.4944	24.6983	1.41
2	26	50	101327	1.31725e+06	0.0769231	16.8193	12.4233	22.7714	44.148	20.8345	1.46
**********	**********	**********	**********	**********	**********	**********	**********	**********	**********	**********
18	264	710	64221.4	941914	0.0681818	14.9102	3.84398	15.4822	8.53051	6.77719
Pooled Ratio		0.0681818	±	0.0175778
Mean Ratio		0.069862	±	0.00416505
Pooled Age		14.9102	±	3.84398	1 S.E.
Mean Crystal Age		15.2772	±	0.911817	1 S.E.
Binomial Age		15.4822	+	8.53051	"+95%"
			-	6.77719	"-95%"
Central Age		14.9102	±	3.84398
Age Dispersion		1.15381e-16	%
Chi-squared		0.746765	with	14	degrees of freedom
P (Chi-Sq)		100	%
MSWD		0.0533403
